# Supplementary material for: The effect of blow flies (Diptera: Calliphoridae) on the size and weight of mangos (Mangifera indica L.)
Source: PeerJ. 2016 Jul 5;4:e2076. doi: 10.7717/peerj.2076 (PMC4941737; doi:10.7717/peerj.2076)
Supplement: Supplemental Information 1 [file peerj-04-2076-s001.xlsx]

## Sheet: Sheet1
Blow fly		Tree2			tree4			tree 6			Closed	Tree 1			Tree 3			tree 5			Open	tree 1			tree 2			tree 3
Flowers/inflorescence		conical	pyramid	irregular	Conical	pyramid	irregular	conical	pyramid	irregular		conical	pyramid	irregular	Conical	pyramid	irregular	conical	pyramid	irregular		conical	pyramid	irregular	Conical	pyramid	irregular	conical	pyramid	irregular
	1	99	158	165	124	134	249	121	160	245		77	111	125	118	170	249	111	138	245		350	350	334	350	412	450	356	410	446
	2	160	114	168	160	145	290	164	170	214		80	121	114	111	160	290	123	214	214		400	360	333	360	450	490	347	437	432
	3	105	114	200	111	138	300	134	145	202		82	90	101	109	148	300	132	195	202		191	200	333	200	409	418	382	419	438
	4	110	130	230	90	170	301	111	192	190		60	110	110	120	178	301	122	160	234		270	374	500	374	402	409	292	401	428
	5	110	136	114	100	135	303	11	200	60		100	105	99	130	175	303	178	178	234		305	383	339	383	398	450	331	441	419
	6	90	198	119	124	134	361	111	111	171		90	93	115	210	176	361	134	201	210		251	392	385	392	392	491	328	472	410
	7	100	160	125	160	112	200	156	114	190		82	93	100	231	210	200	132	190	213		370	401	435	401	383	482	293	482	401
	8	92	134	161	111	123	241	134	121	170		60	90	112	110	176	241	179	179	287		320	419	413	313	365	474	284	509	605
	9	94	156	230	112	112	145	135	182	161		100	110	115	120	156	270	78	161	213		331	437	334	437	356	462	275	518	612
	10	96	134	114	113	114	114	130	187	171		82	105	210	130	134	245	90	218	171		297	364	347	364	347	455	297	348	523
	Avg	105.6	143.4	162.6	120.5	131.7	250.4	120.7	158.2	177.4	#DIV/0!	81.3	102.8	120.1	138.9	168.3	276	127.9	183.4	222.3	AVG	308.5	368	375.3	357.4	391.4	458.1	318.5	443.7	471.4
	Sum	1056	1434	1626	1205	1317	2504	1207	1582	1774	0	813	1028	1201	1389	1683	2760	1279	1834	2223	0	3085	3680	3753	3574	3914	4581	3185	4437	4714
					Blow fly							Closed					open
	Flowers/inflorescence			Conical	105.6	120.5	120.7	115.6	8.66083		Conical	81.3	138.8	127.9	116	30.5413	308.5	357.4	318	327.967	25.9288	14.97
				Pyramid	143.4	131.7	158.2	144.433	13.2802		Pyramid	102.8	168.3	183.3	151.467	42.8087	368	391	443.7	400.9	38.8089	22.4063
				Irregular	162.6	250.4	177.4	196.8	47.0051		Irregular	120.1	276	222.3	206.133	79.1974	375	458.1	471.3	434.8	52.2072	30.1418
															473.6					1163.67
										after 15 days		Blow fly									Closed									Open
	Number and types of flower/tree				Types					Number of Bud		Tree2			tree4			tree 6			Tree 1			Tree 3			tree 5			tree 7			tree 9			tree 8
		Close		conical	pyramid	irregular	total Number of Flower				No. of Twigs	conical	pyramid	irregular	Conical	pyramid	irregular	conical	pyramid	irregular	conical	pyramid	irregular	Conical	pyramid	irregular	conical	pyramid	irregular	conical	pyramid	irregular	Conical	pyramid	irregular	conical	pyramid	irregular
			Tree 1	13	18	22	53				1	2	2	3	2	2	3	5	2	12	2	1	1	1	1	1	1	2	3	4	2	5	3	2	4	3	2	1
			Tree 3	15	34	20	69				2	2	1	4	1	1	1	1	2	11	1	1	4	1	1	1	1	1	1	5	2	8	4	1	5	2	2	8
			Tree 5	34	19	33	86				3	1	2	5	2	2	4	4	2	3	4	2	4	1	2	2	2	2	4	4	3	5	4	6	3	4	2	7
			Avg	20.6667	23.6667	25					4	5	4	2	3	4	3	6	4	3	4	3	3	2	4	3	3	1	3	6	4	3	6	4	7	6	4	3
		Bow fly	Tree 2	19	21	21	61				5	3	5	1	6	2	1	8	2	2	1	2	1	3	5	2	4	2	3	6	5	4	8	5	4	6	5	5
			tree4	11	13	12	36				6	3	1	5	1	1	2	3	1	2	2	1	2	3	1	2	1	1	4	3	3	2	3	3	2	3	6	2
			tree6	20	34	20	74				7	5	4	4	1	4	1	1	4	1	1	4	2	1	4	3	1	4	5	1	4	2	2	4	2	2	4	3
			AVG	16.6667	22.6667	17.6667					8	2	1	6	1	1	6	4	2	1	1	1	1	1	1	4	1	1	1	2	4	1	3	2	4	3	2	5
		Open	tree cont 1	45	50	30	125				9	1	8	8	1	8	8	2	8	4	1	3	1	1	4	4	1	6	3	2	8	4	1	8	4	4	4	4
			tree cont 2	27	23	26	76				10	2	3	5	2	3	12	2	3	2	2	3	2	2	3	6	2	1	2	2	3	2	2	3	7	2	1	4
			tree cont 3	23	43	20	86				Avg	2.6	3.1	4.3	2	2.8	4.1	3.6	3	4.1	1.9	2.1	2.1	1.6	2.6	2.8	1.7	2.1	2.9	3.5	3.8	3.6	3.6	3.8	4.2	3.5	3.2	4.2
			AVG	31.6667	38.6667	25.3333
										After 10 days		Blow fly									Closed									Open
										Number of Bud		Tree2			tree4			tree 6			Tree 1			Tree 3			tree 5			tree 7			tree 9			tree 8
											No. of Twigs	conical	pyramid	irregular	Conical	pyramid	irregular	conical	pyramid	irregular	conical	pyramid	irregular	Conical	pyramid	irregular	conical	pyramid	irregular	conical	pyramid	irregular	Conical	pyramid	irregular	conical	pyramid	irregular
											1	0	1	0	1	0	0	2	1	6	1	0	0	0	0	0	0	1	3	2	1	4	1	1	3	2	2	1
											2	2	0	0	1	1	0	0	2	5	0	0	1	0	0	0	0	0	0	1	2	6	4	1	3	2	1	2
											3	0	1	1	0	2	1	1	2	1	0	0	3	0	1	2	1	2	4	2	1	5	1	4	3	2	1	2
											4	2	1	2	1	1	3	2	1	3	1	3	3	2	2	1	1	0	1	1	2	3	2	2	5	4	2	3
											5	3	2	1	2	2	0	4	2	0	1	1	0	1	2	2	2	1	0	2	2	4	6	2	3	2	1	3
											6	1	0	3	1	1	2	1	1	2	2	1	0	1	0	0	1	1	0	1	1	1	2	1	2	3	2	2
											7	1	2	2	0	4	1	0	2	2	1	2	1	0	1	1	0	1	0	1	2	1	1	4	2	1	1	1
											8	0	2	2	0	2	4	2	2	1	0	1	0	0	1	2	1	0	1	1	2	1	3	2	3	1	1	3
											9	0	1	4	0	4	2	1	4	1	1	0	1	1	2	1	0	1	1	1	5	2	1	6	2	3	3	2
											10	1	3	1	2	0	6	0	3	1	0	1	1	0	1	2	1	1	2	2	2	1	2	1	5	1	1	2
											AVG	1	1.3	1.6	0.8	1.7	1.9	1.3	2	2.2	0.7	0.9	1	0.5	1	1.1	0.7	0.8	1.2	1.4	2	2.8	2.3	2.4	3.1	2.1	1.5	2.1	0
																		number of fruit at marble stage/twigs
	mango fruit size																			Blow fly									Closed									Open
																		Number of Bud		Tree2			tree4			tree 6			Tree 1			Tree 3			tree 5			tree 7			tree 9			tree 8
		Close cage						Blow fly cage											No. of Twigs	conical	pyramid	irregular	Conical	pyramid	irregular	conical	pyramid	irregular	conical	pyramid	irregular	Conical	pyramid	irregular	conical	pyramid	irregular	conical	pyramid	irregular	Conical	pyramid	irregular	conical	pyramid	irregular
		t1		t3		t5		t2		t4		t6							1	0	0	0	0	0	0	1	1	4	0	0	0	0	0	0	0	1	2	1	1	2	1	1	1	2	2	1
		Size	Weight	Size	Weight	Size	Weight	Size	Weight	Size	Weight	Size	Weight						2	0	0	0	0	0	0	0	1	5	0	0	1	0	0	0	0	0	0	1	2	2	2	1	1	1	1	2
waqar	1	5	236.5	2.4	101.2	1.6	40.4	5	193.5	3.5	168.3	4.9	178.9						3	0	1	0	0	1	1	0	0	1	0	0	1	0	1	1	1	0	2	1	1	1	1	2	1	1	1	2
	2	4.9	190.1	2.7	110.3	1.7	50.4	5.5	180	2.5	112.1	6	215.7						4	1	1	1	1	0	1	0	0	1	1	3	1	1	1	1	0	0	1	1	0	2	2	1	2	1	2	3
	3	4	225.2	3.4	135	1.1	20.2	4.1	156	5	156	2.6	175						5	2	1	1	1	1	0	1	1	0	0	1	0	1	0	0	1	1	0	1	1	0	2	1	1	2	1	2
	4	2.6	78.3	5.4	209.7	1.8	52.1	4.2	180.2	3.5	180.2	2.6	202						6	0	0	1	1	0	1	0	0	1	0	1	0	1	0	0	0	1	0	1	1	1	1	1	1	1	2	2
	5	2.6	80.1	2.3	70.1	1.6	40.1	4.9	189	5.2	189	6.6	235.4						7	1	2	2	0	1	1	0	2	1	1	1	1	0	1	1	0	1	0	0	1	1	1	1	1	1	1	0
	6	4	150	2.1	88.9	1.7	49.89	3.5	165.2	2.5	165.2	4.9	180.8						8	0	1	2	0	1	2	0	2	1	0	1	0	0	1	1	0	0	1	1	0	1	1	2	2	1	1	1
	7	3	192.1	3.1	134.5	1.1	21.1	3.9	167	5	167	6	217.8						9	0	1	2	0	2	1	0	1	1	0	0	1	1	1	1	0	1	1	1	0	1	1	1	1	1	1	1
	8	5	156	3.4	140	1.6	38.8	4.4	177.3	3.5	177.3	3.3	143.2						10	0	1	0	0	0	4	0	2	0	0	1	1	0	1	2	1	1	2	2	2	1	2	1	2	1	1	2
	9	3.3	145.2	5.4	207	1.7	48.4	3.3	180	2.1	178	2.2	209						AVG	0.4	0.8	0.9	0.3	0.6	1.1	0.2	1	1.5	0.2	0.8	0.6	0.4	0.6	0.7	0.3	0.6	0.9	1	0.9	1.2	1.4	1.2	1.3	1.2	1.3	1.6
	10	3.3	144.9	2.3	92.1	2.3	70.2	2.3	190	3.1	187	2	208
	AVG	3.77	159.84	3.25	128.88	1.62	43.159	4.11	177.82	3.59	168.01	4.11	196.58
	SD	0.904489	50.6571	1.16039	45.1054	0.324962	14.0927	0.882553	11.345	1.06907	21.0121	1.6706	25.5218
	SE	0.301496	16.8857	0.386796	15.0351	0.108321	4.69758	0.294184	3.78168	0.356355	7.00402	0.556866	8.50726
									Size	closed
		Open								t1	t3	t5	AVG	SD	SE
			Size	weight	Size	weight	Size	weight		3.77	3.25	1.62	2.88	1.12174	0.647637
		1	5.4	201	5.4	210	6.1	227		159.84	128.88	43.1	110.607	60.4772	34.9165
		2	4.9	203	5.5	211	5.4	226		blowfly
		3	5	222	5.9	223	5.3	230		t2	t4	t6
		4	4.7	203	4.7	189	4.1	235		4.11	3.59	4.11	3.93667	0.300222	0.173333
		5	4.3	202	4.2	186	5.7	212		177.82	168.01	196.58	180.803	14.5168	8.38126
		6	4.8	207	4.4	192	5.5	230		open
		7	4.9	206	4.9	198.7	5.9	234		t1	t2	t3
	Size	8	4.7	209	4.3	192.1	5	221		4.94	4.85	5.4	5.06333	0.295014	0.170326
		9	5.3	211	4.6	189	5.6	222		207.4	198.29	224.9	210.197	13.5236	7.80788
		10	5.4	210	4.6	192.1	5.4	212
		AVG	4.94	207.4	4.85	198.29	5.4	224.9
		SD	0.332265	5.88558	0.538981	11.6158	0.52345	7.73886
		SE	0.110755	1.96186	0.17966	3.87193	0.174483	2.57962
In avg form																																														AVG
		Commantary																																												Commantary
																																								START TO STAT THESE DATA
		Number of flowers/ inflorescence										Number of Buds after 15 days									Number of Buds after 10 days										Number of fruits at marble stage															Number of flowers/ inflorescence
			treatment	repli	conical	pyramid	irregular					treatment	repli	conical	pyramid	irregular					treatment	repli	conical	pyramid	irregular						treatment	repli	conical	pyramid	irregular												treatment	repli	conical
		Blow fly	1	1	99	158	165				Blow fly	1	1	2	2	3				Blow fly	1	1	0	1	0					Blow fly	1	1	0	0	0											Close Cage	1	1	81.3
			1	2	160	114	168					1	2	2	1	4					1	2	2	0	0						1	2	0	0	0												1	2	138.8
			1	3	105	114	200					1	3	1	2	5					1	3	0	1	1						1	3	0	1	0												1	3	127.9
			1	4	110	130	230					1	4	5	4	2					1	4	2	1	2						1	4	1	1	1											Blow fly	2	1	105.6
			1	5	110	136	114					1	5	3	5	1					1	5	3	2	1						1	5	2	1	1												2	2	120.5
			1	6	90	198	119					1	6	3	1	5					1	6	1	0	3						1	6	0	0	1												2	3	120.7
			1	7	100	160	125					1	7	5	4	4					1	7	1	2	2						1	7	1	2	2											Open Tree	3	1	308.5
			1	8	92	134	161					1	8	2	1	6					1	8	0	2	2						1	8	0	1	2												3	2	357.4
			1	9	94	156	230					1	9	1	8	8					1	9	0	1	4						1	9	0	1	2												3	3	318
			1	10	96	134	114					1	10	2	3	5					1	10	1	3	1						1	10	0	1	0
			1	11	124	134	249					1	11	2	2	3					1	11	1	0	0						1	11	0	0	0
			1	12	160	145	290					1	12	1	1	1					1	12	1	1	0						1	12	0	0	0
			1	13	111	138	300					1	13	2	2	4					1	13	0	2	1						1	13	0	1	1
			1	14	90	170	301					1	14	3	4	3					1	14	1	1	3						1	14	1	0	1
			1	15	100	135	303					1	15	6	2	1					1	15	2	2	0						1	15	1	1	0
			1	16	124	134	361					1	16	1	1	2					1	16	1	1	2						1	16	1	0	1
			1	17	160	112	200					1	17	1	4	1					1	17	0	4	1						1	17	0	1	1
			1	18	111	123	241					1	18	1	1	6					1	18	0	2	4						1	18	0	1	2
			1	19	112	112	145					1	19	1	8	8					1	19	0	4	2						1	19	0	2	1
			1	20	113	114	114					1	20	2	3	12					1	20	2	0	6						1	20	0	0	4
			1	21	121	160	245					1	21	5	2	12					1	21	2	1	6						1	21	1	1	4
			1	22	164	170	214					1	22	1	2	11					1	22	0	2	5						1	22	0	1	5
			1	23	134	145	202					1	23	4	2	3					1	23	1	2	1						1	23	0	0	1
			1	24	111	192	190					1	24	6	4	3					1	24	2	1	3						1	24	0	0	1
			1	25	11	200	60					1	25	8	2	2					1	25	4	2	0						1	25	1	1	0
			1	26	111	111	171					1	26	3	1	2					1	26	1	1	2						1	26	0	0	1
			1	27	156	114	190					1	27	1	4	1					1	27	0	2	2						1	27	0	2	1
			1	28	134	121	170					1	28	4	2	1					1	28	2	2	1						1	28	0	2	1
			1	29	135	182	161					1	29	2	8	4					1	29	1	4	1						1	29	0	1	1
			1	30	130	187	171					1	30	2	3	2					1	30	0	3	1						1	30	0	2	0
		Close tree	2	1	77	111	125				Close tree	2	1	2	1	1				Close tree	2	1	1	0	0					Close tree	2	1	0	0	0
			2	2	80	121	114					2	2	1	1	4					2	2	0	0	1						2	2	0	0	1
			2	3	82	90	101					2	3	4	2	4					2	3	0	0	3						2	3	0	0	1
			2	4	60	110	110					2	4	4	3	3					2	4	1	3	3						2	4	1	3	1
			2	5	100	105	99					2	5	1	2	1					2	5	1	1	0						2	5	0	1	0
			2	6	90	93	115					2	6	2	1	2					2	6	2	1	0						2	6	0	1	0
			2	7	82	93	100					2	7	1	4	2					2	7	1	2	1						2	7	1	1	1
			2	8	60	90	112					2	8	1	1	1					2	8	0	1	0						2	8	0	1	0
			2	9	100	110	115					2	9	1	3	1					2	9	1	0	1						2	9	0	0	1
			2	10	82	105	210					2	10	2	3	2					2	10	0	1	1						2	10	0	1	1
			2	11	118	170	249					2	11	1	1	1					2	11	0	0	0						2	11	0	0	0
			2	12	111	160	290					2	12	1	1	1					2	12	0	0	0						2	12	0	0	0
			2	13	109	148	300					2	13	1	2	2					2	13	0	1	2						2	13	0	1	1
			2	14	120	178	301					2	14	2	4	3					2	14	2	2	1						2	14	1	1	1
			2	15	130	175	303					2	15	3	5	2					2	15	1	2	2						2	15	1	0	0
			2	16	210	176	361					2	16	3	1	2					2	16	1	0	0						2	16	1	0	0
			2	17	231	210	200					2	17	1	4	3					2	17	0	1	1						2	17	0	1	1
			2	18	110	176	241					2	18	1	1	4					2	18	0	1	2						2	18	0	1	1
			2	19	120	156	270					2	19	1	4	4					2	19	1	2	1						2	19	1	1	1
			2	20	130	134	245					2	20	2	3	6					2	20	0	1	2						2	20	0	1	2
			2	21	111	138	245					2	21	1	2	3					2	21	0	1	3						2	21	0	1	2
			2	22	123	214	214					2	22	1	1	1					2	22	0	0	0						2	22	0	0	0
			2	23	132	195	202					2	23	2	2	4					2	23	1	2	4						2	23	1	0	2
			2	24	122	160	234					2	24	3	1	3					2	24	1	0	1						2	24	0	0	1
			2	25	178	178	234					2	25	4	2	3					2	25	2	1	0						2	25	1	1	0
			2	26	134	201	210					2	26	1	1	4					2	26	1	1	0						2	26	0	1	0
			2	27	132	190	213					2	27	1	4	5					2	27	0	1	0						2	27	0	1	0
			2	28	179	179	287					2	28	1	1	1					2	28	1	0	1						2	28	0	0	1
			2	29	78	161	213					2	29	1	6	3					2	29	0	1	1						2	29	0	1	1
			2	30	90	218	171					2	30	2	1	2					2	30	1	1	2						2	30	1	1	2
		Open tree	3	1	350	350	334				Open tree	3	1	4	2	5				Open tree	3	1	2	1	4					Open tree	3	1	1	1	2
			3	2	400	360	333					3	2	5	2	8					3	2	1	2	6						3	2	1	2	2
			3	3	191	200	333					3	3	4	3	5					3	3	2	1	5						3	3	1	1	1
			3	4	270	374	500					3	4	6	4	3					3	4	1	2	3						3	4	1	0	2
			3	5	305	383	339					3	5	6	5	4					3	5	2	2	4						3	5	1	1	0
			3	6	251	392	385					3	6	3	3	2					3	6	1	1	1						3	6	1	1	1
			3	7	370	401	435					3	7	1	4	2					3	7	1	2	1						3	7	0	1	1
			3	8	320	419	413					3	8	2	4	1					3	8	1	2	1						3	8	1	0	1
			3	9	331	437	334					3	9	2	8	4					3	9	1	5	2						3	9	1	0	1
			3	10	297	364	347					3	10	2	3	2					3	10	2	2	1						3	10	2	2	1
			3	11	350	412	450					3	11	3	2	4					3	11	1	1	3						3	11	1	1	1
			3	12	360	450	490					3	12	4	1	5					3	12	4	1	3						3	12	2	1	1
			3	13	200	409	418					3	13	4	6	3					3	13	1	4	3						3	13	1	2	1
			3	14	374	402	409					3	14	6	4	7					3	14	2	2	5						3	14	2	1	2
			3	15	383	398	450					3	15	8	5	4					3	15	6	2	3						3	15	2	1	1
			3	16	392	392	491					3	16	3	3	2					3	16	2	1	2						3	16	1	1	1
			3	17	401	383	482					3	17	2	4	2					3	17	1	4	2						3	17	1	1	1
			3	18	313	365	474					3	18	3	2	4					3	18	3	2	3						3	18	1	2	2
			3	19	437	356	462					3	19	1	8	4					3	19	1	6	2						3	19	1	1	1
			3	20	364	347	455					3	20	2	3	7					3	20	2	1	5						3	20	2	1	2
			3	21	356	410	446					3	21	3	2	1					3	21	2	2	1						3	21	2	2	1
			3	22	347	437	432					3	22	2	2	8					3	22	2	1	2						3	22	1	1	2
			3	23	382	419	438					3	23	4	2	7					3	23	2	1	2						3	23	1	1	2
			3	24	292	401	428					3	24	6	4	3					3	24	4	2	3						3	24	1	2	3
			3	25	331	441	419					3	25	6	5	5					3	25	2	1	3						3	25	2	1	2
			3	26	328	472	410					3	26	3	6	2					3	26	3	2	2						3	26	1	2	2
			3	27	293	482	401					3	27	2	4	3					3	27	1	1	1						3	27	1	1	0
			3	28	284	509	605					3	28	3	2	5					3	28	1	1	3						3	28	1	1	1
			3	29	275	518	612					3	29	4	4	4					3	29	3	3	2						3	29	1	1	1
			3	30	297	348	523					3	30	2	1	4					3	30	1	1	2						3	30	1	1	2
[truncated: 45 more columns]

## Sheet: Sheet3
																							Conical	Pyramid	Irregular
		Conical	Pyramid	Irregular					Conical	Pyramid	Irregular			Conical	Pyramid	Irregular						Close Cage	0.3	0.666667	0.733333
	Close Cage	116	151.467	206.133				Close Cage	0.633333	0.9	1.1		Close Cage	0.633333	0.9	1.1						Blow Fly	0.3	0.8	1.16667
	Blow Fly	115.6	144.433	196.8				Blow Fly	2.73333	2.96667	4.16667		Blow Fly	1.03333	1.66667	1.9						Open	1.2	1.24	1.36667
	Open	327.967	400.9	434.8				Open	3.53333	3.6	4		Open	1.93333	1.96667	2.66667							0.1	0.11547	0.152753
		30.5413	42.8087	79.1974					0.152753	0.288675	0.43589			0.11547	0.1	0.1							0.1	0.3	0.4
		8.66083	13.2802	47.0051					0.80829	0.152753	0.11547			0.251661	0.351188	0.3							0.2	0.208167	0.208167
		25.9288	38.8089	52.2072					0.057735	0.34641	0.34641			0.472582	0.450925	0.51316
